# Supplementary material for: Phase I Radiation Dose-Escalation Study to Investigate the Dose-Limiting Toxicity of Concurrent Intra-Arterial Chemotherapy for Unresectable Hepatocellular Carcinoma
Source: MDPI journal article supplement (doi:10.3390/cancers12061612), 2020-06-18
Supplement: s1 [file s1]

# Supplementary Materials: Phase I Radiation Dose-Escalation Study to Investigate the Dose-Limiting Toxicity of Concurrent Intra-Arterial Chemotherapy for Unresectable Hepatocellular Carcinoma

Yeona Cho, Jun Won Kim, Ja Kyung Kim, Kwan Sik Lee, Jung Il Lee, Hyun Woong Lee, Kwang-Hun Lee, Seung-Moon Joo, Jin Hong Lim and Ik Jae Lee

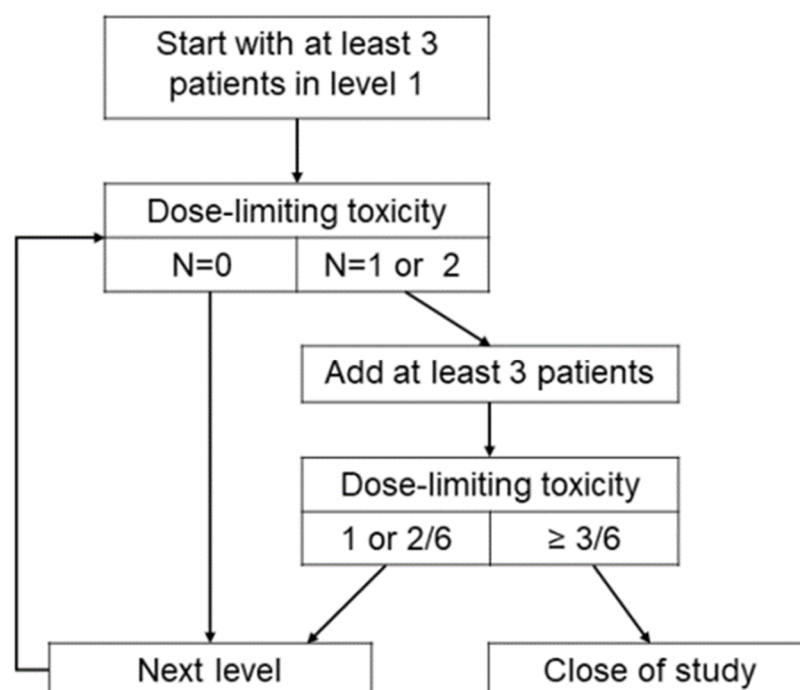

**Figure S1.** Protocol scheme for the current Phase I study.

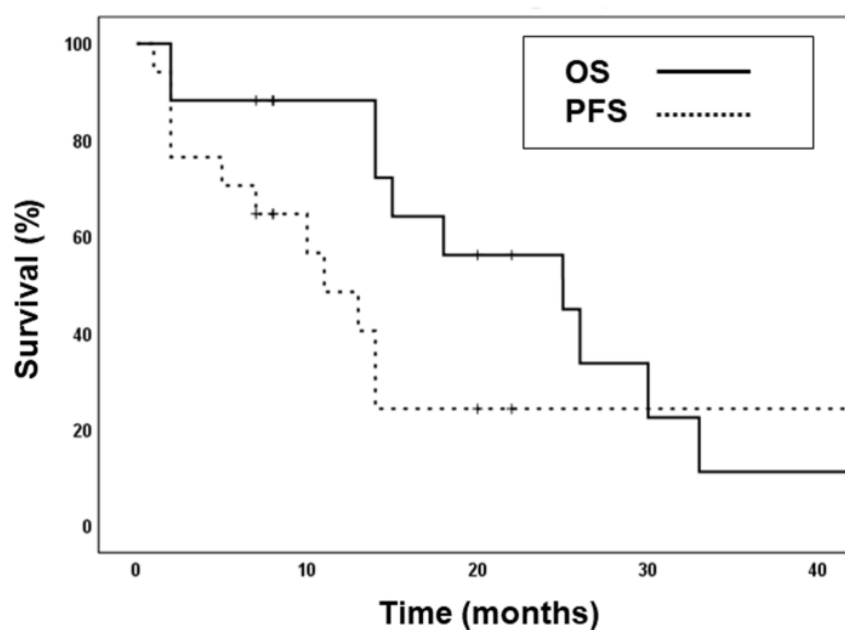

**Figure S2.** Progression-free survival and overall survival of all patients ( $n = 17$ ).

**Table 1.** Dose escalation schedule.

| Dose level | PTV1 (Gy) | BED10 (Gy) | BED3 (Gy) | PTV2 (Gy) | Fractions | No. of patients |
|------------|-----------|------------|-----------|-----------|-----------|-----------------|
| 1          | 2.1       | 63.53      | 89.25     | 1.8       | 25        | 4               |
| 2          | 2.3       | 70.72      | 101.58    | 2.0       | 25        | 6               |
| 3          | 2.5       | 78.13      | 114.58    | 2.0       | 25        | 7               |

Abbreviations: PTV, planning target volume; BED10, biologically effective dose with  $\alpha/\beta$  ratio = 10; BED3, biologically effective dose with  $\alpha/\beta$  ratio = 3.

**Table S2.** Normal tissue radiation dose constraints.

| Organs at risk                                                                              | Dose Constraints                                |
|---------------------------------------------------------------------------------------------|-------------------------------------------------|
| Uninvolved liver                                                                            | Mean dose <30 Gy<br>$V_{30\text{ Gy}} < 30\%$ * |
| Stomach and duodenum                                                                        | $D_{2\text{cc}} < 45\text{ Gy}^\S$              |
| Spinal cord                                                                                 | Maximum point dose < 50 Gy                      |
| Kidney                                                                                      | Mean dose < 18 Gy                               |
| If mean kidney dose to one kidney >18 Gy, $V_{6\text{ Gy}}(\text{remaining kidney}) < 30\%$ |                                                 |

\*  $V_X$  Gy is defined as the percent of the liver volume that received x Gy or more.  $\S$   $D_X$  cc is defined as the dose received by x cc of the organ volume.

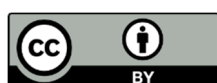

© 2020 by the authors. Submitted for possible open access publication under the terms and conditions of the Creative Commons Attribution (CC BY) license (<http://creativecommons.org/licenses/by/4.0/>).
